# Supplementary material for: Molybdenum(0) tricarbonyl and tetracarbonyl complexes with a cationic pyrazolylpyridine ligand: synthesis, crystal structures and catalytic performance in olefin epoxidation
Source: Royal Society of Chemistry journal article supplement (doi:10.1039/c8ra01687a), 2018-01-01
Supplement: c8ra01687a1.pdf [file c8ra01687a1.pdf]

## Electronic Supporting Information

### **Molybdenum(0) Tricarbonyl and Tetracarbonyl Complexes with a Cationic Pyrazolylpyridine Ligand: Synthesis, Crystal Structures and Catalytic Performance in Olefin Epoxidation**

Lucie S. Nogueira,<sup>a</sup> Patrícia Neves,<sup>a</sup> Ana C. Gomes,<sup>a</sup> Pedro Lavrador,<sup>a</sup> Luís Cunha-Silva,<sup>b</sup> Anabela A. Valente,<sup>\*a</sup> Isabel S. Gonçalves<sup>a</sup> and Martyn Pillinger<sup>\*a</sup>

- a Department of Chemistry, CICECO - Aveiro Institute of Materials, University of Aveiro, Campus Universitário de Santiago, 3810-193 Aveiro, Portugal  
E-mail: atav@ua.pt (A.A.V.); mpillinger@ua.pt (M.P.)
- b REQUIMTE/LAQV & Department of Chemistry and Biochemistry, Faculty of Sciences, University of Porto, 4169-007 Porto, Portugal

#### **Contents**

|             |                                                                                                                                                                                                 |
|-------------|-------------------------------------------------------------------------------------------------------------------------------------------------------------------------------------------------|
| Pages S2    | <b>Additional experimental details</b><br>Chemicals and physical measurements.                                                                                                                  |
| Pages S2-S6 | <b>Single-Crystal X-Ray Diffraction Studies</b><br>Experimental, Crystal and structure refinement data (Table S1), Supramolecular interactions and crystal packing (Fig. S1 and Table S2).      |
| Page S7     | <b>Figure S2.</b> TGA curves of tricarbonyl complex <b>1</b> , tetracarbonyl complex <b>2</b> , and the hybrid material <b>3</b> .                                                              |
| Page S7     | <b>Figure S3.</b> Powder X-ray diffraction patterns of the hybrid material <b>3</b> .                                                                                                           |
| Page S8     | <b>Figure S4.</b> FT-IR and FT-Raman spectra of [ptapzpy]Br, tricarbonyl complex <b>1</b> , tetracarbonyl complex <b>2</b> , and the hybrid material <b>3</b> .                                 |
| Page S9     | <b>Figure S5.</b> <sup>13</sup> C solution and <sup>13</sup> C{ <sup>1</sup> H} CP MAS NMR spectra.                                                                                             |
| Page S10    | <b>Table S3.</b> Catalytic performance of compounds <b>1</b> and <b>2</b> compared with selected literature data.                                                                               |
| Page S11    | <b>Table S4.</b> Comparison of FT-IR bands observed for recovered solids with corresponding bands for compounds containing the $\beta$ -[Mo <sub>8</sub> O <sub>26</sub> ] <sup>4-</sup> anion. |
| Page S11    | <b>Table S5.</b> Elemental analysis results.                                                                                                                                                    |
| Page S12    | <b>Fig. S6 and Fig. S7.</b> Powder XRD and ATR FT-IR spectra of recovered solids and (bmim) <sub>3</sub> NH <sub>4</sub> [Mo <sub>8</sub> O <sub>26</sub> ].                                    |
| Page S13    | <b>References</b>                                                                                                                                                                               |

## Additional experimental details

**Chemicals:** Hydrazine ( $\text{N}_2\text{H}_4 \cdot \text{H}_2\text{O}$ , hydrate solution, 80 %), NaH (60 % dispersion in mineral oil), piperidine (99.5 %, Carlo-Erba), (3-bromopropyl)trimethylammonium bromide (97 %), [bmim]NTf<sub>2</sub> (99 %, Iolitec), [bmim]PF<sub>6</sub> (99 %, Iolitec), Mo(CO)<sub>6</sub>, 30 wt.% H<sub>2</sub>O<sub>2</sub>, 5-6 M TBHP in decane, 70 wt.% aq. TBHP, *cis*-cyclooctene (95 %, Alfa Aesar), styrene ( $\geq 99$  %) and DL-limonene ( $\geq 95$  %, Merck) were acquired from Sigma-Aldrich unless otherwise indicated, and used as received. Solvents were purchased from commercial suppliers and used as received ( $\geq 99$  %, Sigma-Aldrich, Carlo-Erba and Riedl-de-Haën). 2-[3(5)-Pyrazolyl]pyridine<sup>1</sup> and *cis*-[Mo(CO)<sub>4</sub>(pip)<sub>2</sub>]<sup>2</sup> were prepared as described previously. A literature procedure<sup>3</sup> for the preparation of (bmim)<sub>4</sub>[Mo<sub>8</sub>O<sub>26</sub>] (involving addition of [bmim]Cl to an acidified solution of ammonium heptamolybdate) was followed but gave the compound (bmim)<sub>3</sub>NH<sub>4</sub>[Mo<sub>8</sub>O<sub>26</sub>] (**6**), which was recently reported by Linguito *et al.*<sup>4</sup>

**Physical measurements:** Microanalyses for C, H and N were carried out at the Department of Chemistry, University of Aveiro, with a Truspec Micro CHNS 630-200-200 elemental analyser. PXRD data were collected at ambient temperature using a PANalytical Empyrean instrument equipped with a PIXcel 1D detector set at 240 mm from the sample. Cu-K <sub>$\alpha$ 1,2</sub> X-radiation ( $\lambda_1 = 1.540598 \text{ \AA}$ ;  $\lambda_2 = 1.544426 \text{ \AA}$ ) filtered with a nickel foil was used along with a standard transmission sample holder. Working operating conditions for the X-ray tube: 45 kV and 40 mA. Intensity data were collected in continuous mode in the ca.  $3.5 \leq 2\theta \leq 70^\circ$  range. TGA was performed using a Shimadzu TGA-50 system at a heating rate of  $5 \text{ }^\circ\text{C min}^{-1}$  under air. FT-IR spectra were recorded on a Mattson 7000 FT-IR spectrometer using KBr pellets. Attenuated total reflectance (ATR) FT-IR spectra were measured using a Specac Golden Gate Mk II ATR accessory having a diamond top plate and KRS-5 focusing lenses. FT-Raman spectra were recorded on an RFS-100 Bruker FT-Spectrometer equipped with a Nd:YAG laser with an excitation wavelength of 1064 nm. <sup>1</sup>H and <sup>13</sup>C solution NMR spectra were recorded on Bruker Avance 300 and 400 spectrometers. Chemical shifts are quoted in ppm from TMS. Solid-state <sup>13</sup>C{<sup>1</sup>H} CP MAS NMR spectra were recorded using a Bruker Avance 400 (narrow bore) spectrometer with an ultrashielded static magnetic field of 100.6 MHz. The spectra were recorded with  $2.75 \text{ } \mu\text{s}$  <sup>1</sup>H 90° pulses, 2.0 ms contact time, spinning rate of 14 kHz, and 5 s recycle delays. Chemical shifts are quoted in ppm from TMS.

## Single-Crystal X-Ray Diffraction Studies

**Experimental:** Single crystals of [ptapzpy]Br suitable for X-ray diffraction were obtained by slow diffusion of diethyl ether into a concentrated solution of [ptapzpy]Br in dichloromethane. To obtain single crystals of **1** and **2**, a mixture of Mo(CO)<sub>6</sub> (0.08 g, 0.30 mmol), [ptapzpy]Br (0.10 g, 0.30 mmol) and CH<sub>3</sub>CN (10 mL) was refluxed under N<sub>2</sub> for 30 min,

and the resultant solution was filtered off. Yellow (**1**·CH<sub>3</sub>CN) and orange (**2**·CH<sub>3</sub>CN) single crystals were obtained after vapor diffusion of diethyl ether into the solution at ambient temperature.

Crystalline material of the compounds [ptapzpy]Br, [Mo(CO)<sub>3</sub>(ptapzpy)Br]·CH<sub>3</sub>CN (**1**·CH<sub>3</sub>CN) and [Mo(CO)<sub>4</sub>(ptapzpy)]Br·CH<sub>3</sub>CN (**2**·CH<sub>3</sub>CN) was harvested from the crystallization vials, immersed in Fomblin® Y oil, and a single-crystal of each sample was mounted on the respective CryoLoops with the support of a stereomicroscope.<sup>5</sup> Full diffraction data sets were obtained at 150(2) K on a Bruker X8 APEX II CCD area-detector diffractometer (Mo K $\alpha$  graphite-monochromated radiation,  $\lambda = 0.71073$  Å), with the acquisition controlled by APEX2 software.<sup>6</sup> Collected images were processed using SAINT+,<sup>7</sup> and absorption effects were corrected through the multi-scan semi-empirical method implemented in SADABS.<sup>8</sup> The crystal structures were solved using the algorithms implemented in SHELXT-2014,<sup>9,10</sup> and all non-H atoms were located from difference Fourier maps calculated from successive full-matrix least squares refinement cycles on  $F^2$  using SHELXL-v.2014 (Mo, C, Br, N and O atoms were successfully refined with anisotropic displacement parameters).<sup>9,11</sup> The relatively long bond length of 2.072(9) Å for Mo-C17 (axial CO) in the structure of **1**·CH<sub>3</sub>CN is due to a slight crystalline disorder between Br1 and C17-O3, which was not possible to modulate in the crystal refinement. The positional disorder of these two groups originates an increase in the Mo-C17 bond length. H-atoms connected to the distinct carbons were fixed at geometrical positions using the following *HFIX* instructions in SHELXL-v.2014: *137* for the terminal –CH<sub>3</sub>, *23* for the –CH<sub>2</sub>– and *43* for the aromatic groups, and included in refinement cycles in riding-motion approximation with isotropic thermal displacement parameters ( $U_{iso}$ ) fixed at  $1.2 \times$  or  $1.5 \times U_{eq}$  of the parent C-atom. Table S1 shows selected information about the single-crystal X-ray data collection and the structure refinements.

**Supramolecular interactions and crystal packing:** The absence of hydrogen atoms attached to either oxygen or nitrogen in the ligand ptapzpy and the complexes **1** and **2** prevents the occurrence of strong hydrogen bonds in the three structures. Consequently the packing arrangement of the organic ligand (in the structure of [ptapzpy]Br) and complexes (in the structures of **1**·MeCN and **2**·MeCN) is basically driven by effective space filling closely mediated by an extensive network weak of C–H⋯Acceptor and  $\pi$ ⋯ $\pi$  intermolecular interactions (Fig. S1; geometric details about weak hydrogen bonds are summarized in Table S2). The bromide anion in the three crystal structures, acting as either a counterion or metal-coordinated ligand, plays a decisive role in the establishment of a large number of such interactions.

In the extended structure of [ptapzpy]Br the adjacent ligands interact by weak C–H⋯N hydrogen bonds (light blue dashed lines in Fig. S1a). These intermolecular interactions lead to the formation of one-dimensional (1D) supramolecular networks (infinite chains) along the [0 1 0] direction of the unit cell (not shown). Furthermore, the bromide anions interconnect

these organic chains by numerous and distinct C–H···Br interactions (drawn as light green dashed lines) ultimately leading to a 3D supramolecular network.

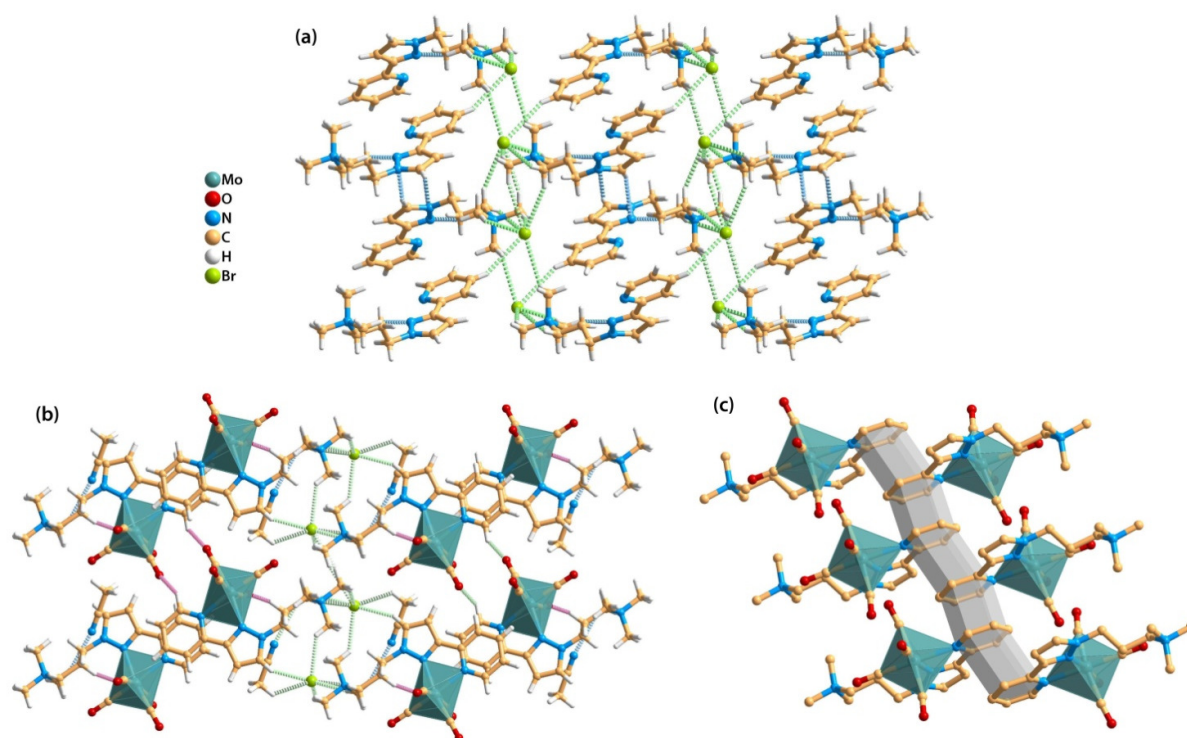

**Fig. S1** Representation of selected features of the extended crystal structures: (a) C–H···N and C–H···Br hydrogen bonds in [ptapzpy]Br; (b) C–H···O, C–H···N and C–H···Br interactions in **2**·CH<sub>3</sub>CN; (c)  $\pi$ ··· $\pi$  stacking between the pyridine rings of adjacent complexes **2** (grey shadow). Weak C–H···O, C–H···N and C–H···Br hydrogen bonds are shown as pink, blue and green dashed lines, respectively. The geometric details of these interactions are listed in Table S2.

The packing arrangement of neighbouring cationic complexes [Mo(CO)<sub>4</sub>(2-(1-propyltrimethylammonium-3-pyrazolyl)pyridine)]<sup>+</sup> in **2**·CH<sub>3</sub>CN is driven by C–H···O intermolecular interactions (light pink dashed lines in Fig. S1b) involving the carbonyl groups, as well as by  $\pi$ ··· $\pi$  stacking between the pyridine rings of adjacent complexes [Cg···Cg distances of 3.7901(6) and 3.8623(6) Å; grey shadow in Fig. S1c]. Furthermore, the CH<sub>3</sub>CN molecule of crystallisation establishes C–H···N interactions with the complexes (light blue dashed lines in Fig. S1b). In a mode analogous to that described for [ptapzpy]Br, the bromide anions are involved in an extensive network of weak C–H···Br hydrogen bonds (light green dashed lines in Fig. S1b), strengthening the cohesion of the 3D supramolecular structure of the compound **2**·CH<sub>3</sub>CN. Similarly, the packing arrangement of adjacent neutral complexes [Mo(CO)<sub>3</sub>(ptapzpy)Br] (**1**) is also driven by diverse C–H···O, C–H···O and C–H···Br weak hydrogen bonds, involving adjacent complexes and also the CH<sub>3</sub>CN molecules (not shown; for geometric details about these interactions see Table S2).

**Table S1** Crystal and structure refinement data for the compounds [ptapzpy]Br, [Mo(CO)<sub>3</sub>(ptapzpy)Br]·CH<sub>3</sub>CN (**1**·CH<sub>3</sub>CN) and [Mo(CO)<sub>4</sub>(ptapzpy)]Br·CH<sub>3</sub>CN (**2**·CH<sub>3</sub>CN).

|                                                                            | [ptapzpy]Br                                                       | <b>1</b> ·CH <sub>3</sub> CN                                      | <b>2</b> ·CH <sub>3</sub> CN                                      |
|----------------------------------------------------------------------------|-------------------------------------------------------------------|-------------------------------------------------------------------|-------------------------------------------------------------------|
| Chemical formula                                                           | C <sub>14</sub> H <sub>21</sub> BrN <sub>4</sub>                  | C <sub>19</sub> H <sub>24</sub> BrMoN <sub>5</sub> O <sub>3</sub> | C <sub>20</sub> H <sub>24</sub> BrMoN <sub>5</sub> O <sub>4</sub> |
| <i>M<sub>r</sub></i>                                                       | 325.26                                                            | 546.28                                                            | 574.23                                                            |
| Crystal description                                                        | Colorless prism                                                   | Yellow prism                                                      | Orange prism                                                      |
| Crystal size/mm                                                            | 0.19 × 0.07 × 0.05                                                | 0.08 × 0.02 × 0.02                                                | 0.08 × 0.05 × 0.03                                                |
| Crystal system, space group                                                | Monoclinic, <i>P</i> 2 <sub>1</sub> / <i>c</i>                    | Monoclinic, <i>P</i> 2 <sub>1</sub>                               | Triclinic, <i>P</i> -1                                            |
| <i>a</i> /Å                                                                | 9.0727(4)                                                         | 7.4060(6)                                                         | 7.5420(12)                                                        |
| <i>b</i> /Å                                                                | 7.6409(3)                                                         | 9.7868(7)                                                         | 8.9322(12)                                                        |
| <i>c</i> /Å                                                                | 22.0574(10)                                                       | 15.3808(8)                                                        | 17.705(3)                                                         |
| <i>α</i> /°                                                                | 90                                                                | 90                                                                | 87.812(7)                                                         |
| <i>β</i> /°                                                                | 94.711(2)                                                         | 97.385(4)                                                         | 88.701(8)                                                         |
| <i>γ</i> /°                                                                | 90                                                                | 90                                                                | 87.216(7)                                                         |
| Volume/Å <sup>3</sup>                                                      | 1523.93(11)                                                       | 1105.6(2)                                                         | 1190.2(3)                                                         |
| <i>Z</i>                                                                   | 4                                                                 | 2                                                                 | 2                                                                 |
| <i>ρ</i> <sub>calculated</sub> /g cm <sup>-3</sup>                         | 1.418                                                             | 1.641                                                             | 1.602                                                             |
| <i>F</i> (000)                                                             | 672                                                               | 548                                                               | 576                                                               |
| <i>μ</i> /mm <sup>-1</sup>                                                 | 2.691                                                             | 2.429                                                             | 2.264                                                             |
| <i>θ</i> range/°                                                           | 3.659 to 30.033                                                   | 3.843 to 28.278                                                   | 3.688 to 26.370                                                   |
| Index ranges                                                               | -12 ≤ <i>h</i> ≤ 12<br>-10 ≤ <i>k</i> ≤ 10<br>-30 ≤ <i>l</i> ≤ 31 | -9 ≤ <i>h</i> ≤ 8<br>-13 ≤ <i>k</i> ≤ 11<br>-20 ≤ <i>l</i> ≤ 20   | -9 ≤ <i>h</i> ≤ 9<br>-11 ≤ <i>k</i> ≤ 11<br>-22 ≤ <i>l</i> ≤ 22   |
| Reflections collected                                                      | 55072                                                             | 18898                                                             | 40010                                                             |
| Independent reflections                                                    | 4440<br>( <i>R</i> <sub>int</sub> = 0.0311)                       | 5075<br>( <i>R</i> <sub>int</sub> = 0.0477)                       | 4843<br>( <i>R</i> <sub>int</sub> = 0.0364)                       |
| Final <i>R</i> indices [ <i>I</i> > 2σ( <i>I</i> )]                        | <i>R</i> <sub>1</sub> = 0.0232<br><i>wR</i> <sub>2</sub> = 0.0511 | <i>R</i> <sub>1</sub> = 0.0412<br><i>wR</i> <sub>2</sub> = 0.0825 | <i>R</i> <sub>1</sub> = 0.0241<br><i>wR</i> <sub>2</sub> = 0.0529 |
| Final <i>R</i> indices (all data)                                          | <i>R</i> <sub>1</sub> = 0.0386<br><i>wR</i> <sub>2</sub> = 0.0564 | <i>R</i> <sub>1</sub> = 0.0578<br><i>wR</i> <sub>2</sub> = 0.0889 | <i>R</i> <sub>1</sub> = 0.0313<br><i>wR</i> <sub>2</sub> = 0.0555 |
| Δ <i>ρ</i> <sub>max</sub> and Δ <i>ρ</i> <sub>min</sub> /e Å <sup>-3</sup> | 0.363 and -0.212                                                  | 1.313 and -0.701                                                  | 0.776 and -0.550                                                  |

**Table S2** Geometric information for the C–H⋯A hydrogen bonding interactions of the compounds [ptapzpy]Br, **1**·CH<sub>3</sub>CN and **2**·CH<sub>3</sub>CN.<sup>a</sup>

| Compound                     | C–H⋯A                        | <i>d</i> (H⋯A)/Å | <i>d</i> (C⋯A)/Å | ∠(CHA)/° |
|------------------------------|------------------------------|------------------|------------------|----------|
| [ptapzpy]Br                  | C4–H4⋯Br1 <sup>i</sup>       | 2.97             | 3.9123(14)       | 172.0    |
|                              | C7–H7⋯Br1 <sup>i</sup>       | 2.87             | 3.8173(14)       | 172.9    |
|                              | C8–H8⋯N2 <sup>ii</sup>       | 2.68             | 3.4852(19)       | 143.2    |
|                              | C11–H11A⋯Br1                 | 2.73             | 3.6717(13)       | 159.5    |
|                              | C11–H11B⋯Br1 <sup>iii</sup>  | 3.00             | 3.9100(13)       | 153.0    |
|                              | C12–H12A⋯Br1 <sup>iv</sup>   | 3.08             | 3.5585(15)       | 111.8    |
|                              | C13–H13A⋯Br1 <sup>v</sup>    | 2.93             | 3.8404(15)       | 154.6    |
|                              | C13–H13B⋯N2 <sup>v</sup>     | 2.58             | 3.2034(18)       | 121.3    |
|                              | C14–H14A⋯Br1 <sup>iii</sup>  | 2.95             | 3.8783(16)       | 159.3    |
|                              | C14–H14C⋯Br1 <sup>v</sup>    | 2.88             | 3.8003(14)       | 156.9    |
| <b>1</b> ·CH <sub>3</sub> CN | C8–H8⋯N5 <sup>vi</sup>       | 2.53             | 3.434(10)        | 158.4    |
|                              | C9–H9A⋯Br1 <sup>vii</sup>    | 3.09             | 3.573(6)         | 111.5    |
|                              | C10–H10A⋯Br1                 | 2.97             | 3.940(6)         | 165.1    |
|                              | C10–H10B⋯Br1 <sup>vii</sup>  | 3.03             | 3.650(6)         | 121.9    |
|                              | C12–H12B⋯O2 <sup>ix</sup>    | 2.57             | 3.509(11)        | 160.7    |
|                              | C12–H12B⋯Br1 <sup>viii</sup> | 3.11             | 3.987(9)         | 149.4    |
|                              | C13–H13A⋯Br1 <sup>viii</sup> | 2.98             | 3.849(8)         | 148.7    |
|                              | C13–H13C⋯O2 <sup>viii</sup>  | 2.62             | 3.443(10)        | 141.8    |
|                              | C14–H14C⋯Br1 <sup>viii</sup> | 2.98             | 3.881(7)         | 154.0    |
|                              | C19–H19A⋯Br1 <sup>x</sup>    | 2.84             | 3.780(10)        | 160.2    |
| <b>2</b> ·CH <sub>3</sub> CN | C19–H19B⋯O2 <sup>xi</sup>    | 2.47             | 3.441(10)        | 169.4    |
|                              | C19–H19C⋯O3 <sup>xi</sup>    | 2.59             | 3.348(10)        | 134.5    |
|                              | C1–H1⋯O3 <sup>xii</sup>      | 2.54             | 3.272(3)         | 134.1    |
|                              | C8–H8⋯Br1 <sup>xiii</sup>    | 2.88             | 3.736(2)         | 150.5    |
|                              | C10–H10A⋯O4 <sup>xiv</sup>   | 2.53             | 3.266(3)         | 130.8    |
|                              | C11–H11B⋯Br1 <sup>xv</sup>   | 2.83             | 3.773(3)         | 159.6    |
|                              | C12–H12A⋯Br1 <sup>xiii</sup> | 2.90             | 3.589(3)         | 128.0    |
|                              | C13–H13A⋯Br1 <sup>xv</sup>   | 2.94             | 3.842(3)         | 154.2    |
|                              | C13–H13B⋯Br1                 | 2.79             | 3.751(2)         | 166.2    |
|                              | C14–H14A⋯Br1 <sup>xvi</sup>  | 2.87             | 3.826(3)         | 165.7    |
| <b>2</b> ·CH <sub>3</sub> CN | C14–H14C⋯N5 <sup>xiii</sup>  | 2.65             | 3.582(4)         | 158.6    |
|                              | C19–H19A⋯Br1                 | 2.97             | 3.592(3)         | 122.3    |

<sup>a</sup> Symmetry transformations used to generate equivalent atoms: (i)  $x, -y+3/2, z-1/2$ ; (ii)  $-x+1, y+1/2, -z+1/2$ ; (iii)  $-x+1, -y+2, -z+1$ ; (iv)  $-x, -y+2, -z+1$ ; (v)  $x, y+1, z$ ; (vi)  $-x+1, y-1/2, -z+1$ ; (vii)  $x-1, y, z$ ; (viii)  $-x+1, y-1/2, -z+2$ ; (ix)  $x-1, y-1, z$ ; (x)  $-x+2, y+1/2, -z+1$ ; (xi)  $-x+2, y-1/2, -z+1$ ; (xii)  $-x+2, -y+1, -z$ ; (xiii)  $x, y+1, z$ ; (xiv)  $x-1, y, z$ ; (xv)  $-x+1, -y+1, -z+1$ ; (xvi)  $-x, -y+1, -z+1$ .

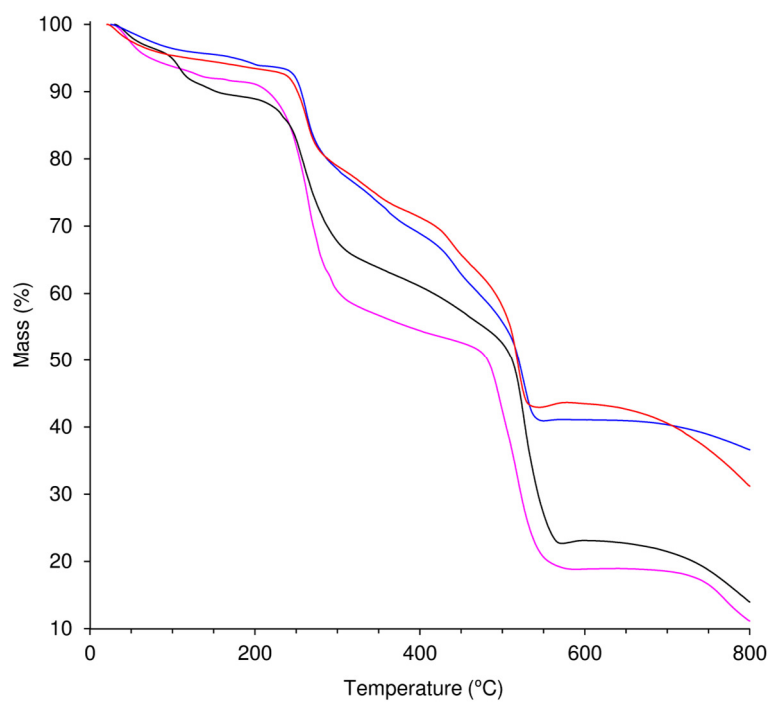

**Fig. S2** TGA curves of the tricarbonyl complex **1** (—), tetracarbonyl complex **2** (—), and the hybrid material **3** prepared from **1** (—) and **2** (—).

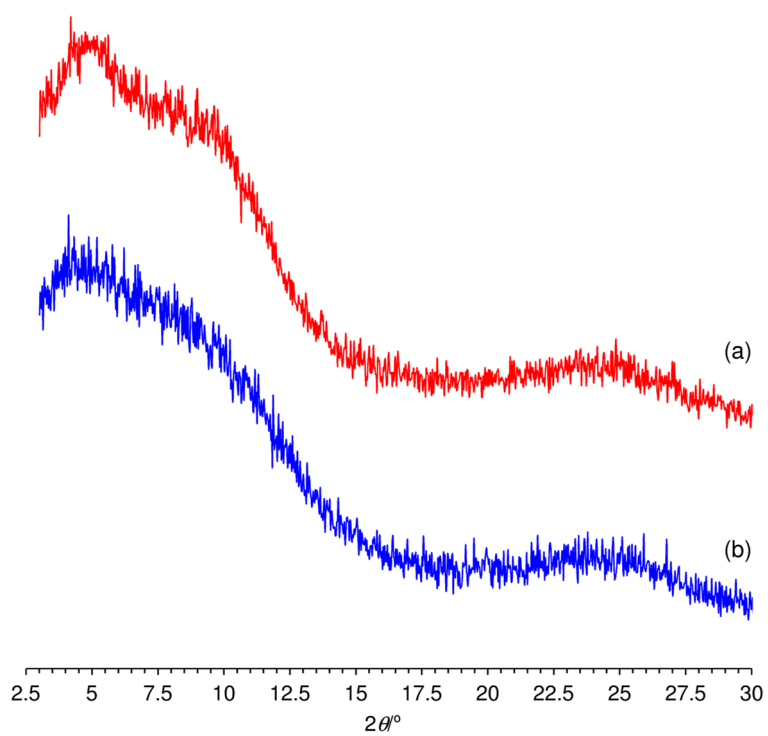

**Fig. S3** Powder X-ray diffraction patterns in the range of  $2.5\text{-}30^\circ 2\theta$  of the hybrid material **3** prepared from **1** (—) and **2** (—).

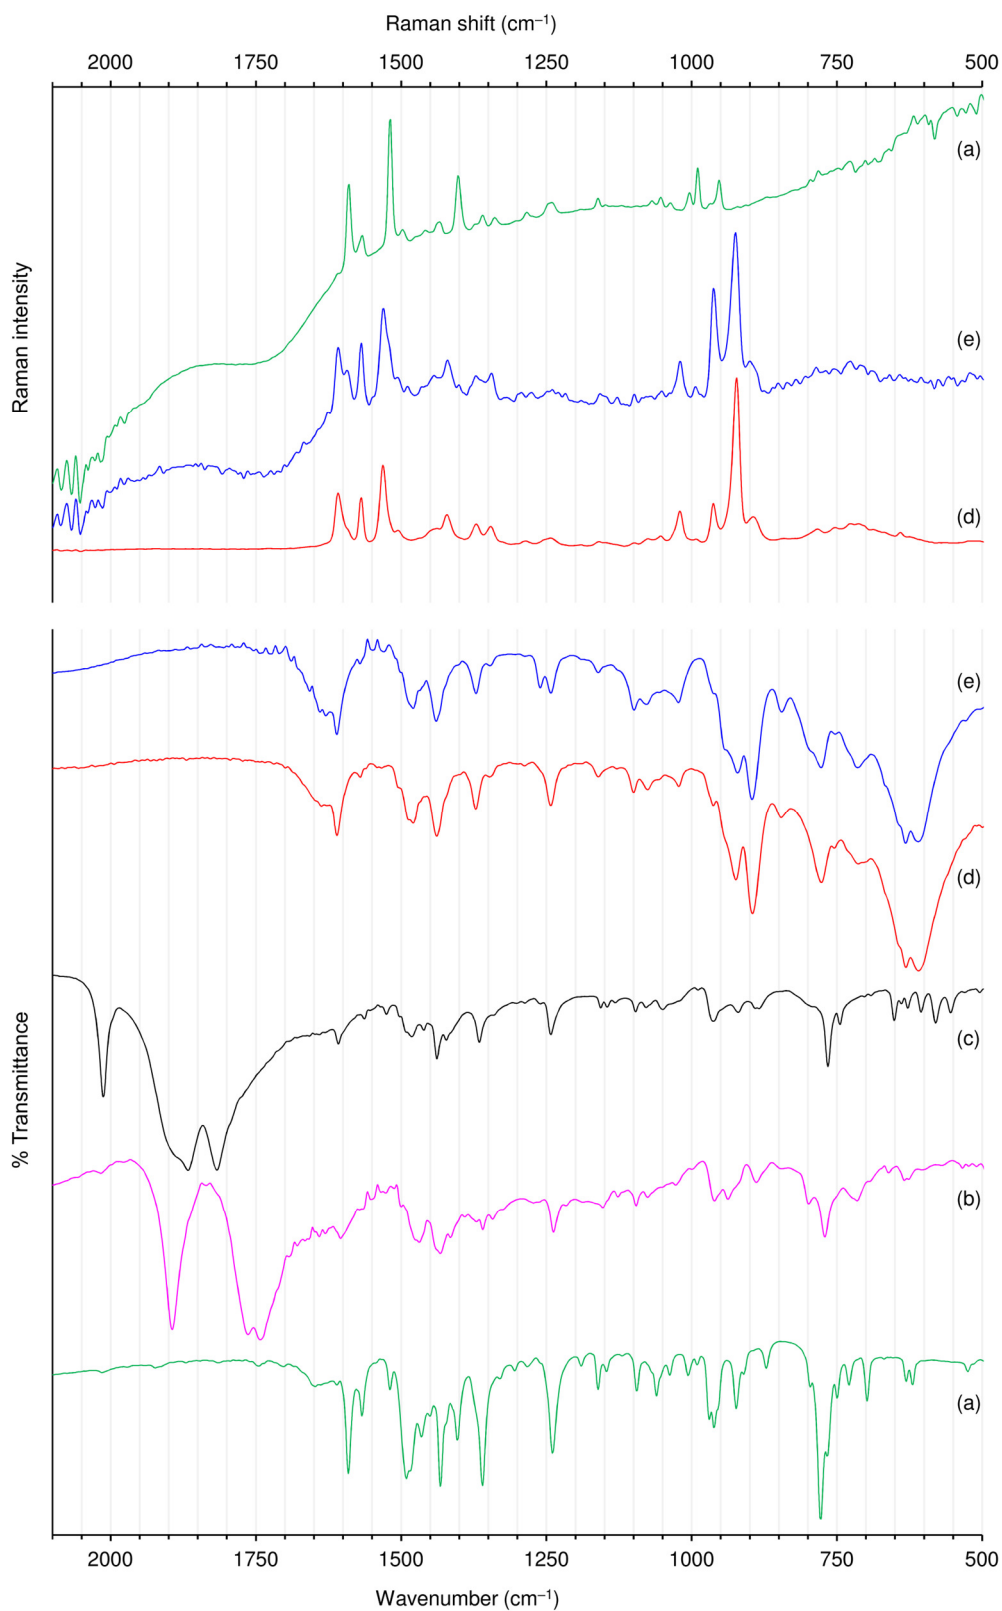

**Fig. S4** FT-IR (bottom graph) and FT-Raman (top graph) spectra in the range of 500-2100  $\text{cm}^{-1}$  of (a) [ptapzpy]Br, (b) tricarbyonyl complex **1**, (c) tetracarbyonyl complex **2**, and the hybrid material **3** prepared from **1** (d) and **2** (e).



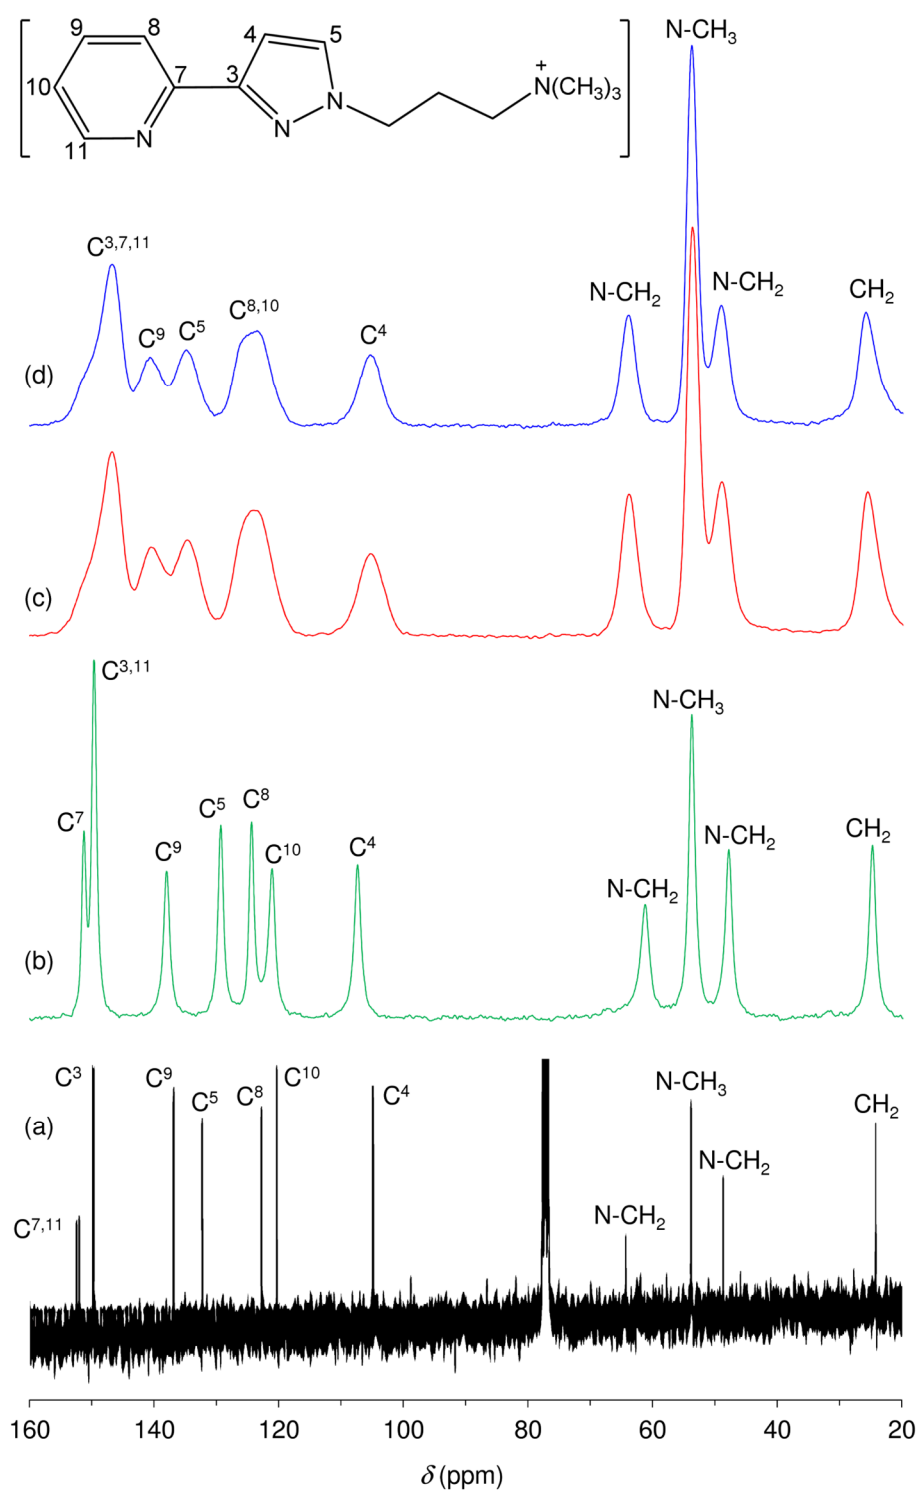

**Fig. S5**  $^{13}\text{C}$  solution (a) and  $^{13}\text{C}\{^1\text{H}\}$  CP MAS NMR (b-d) spectra with assignments of (a,b) [ptapzpy]Br and the hybrid material **3** prepared from **1** (c) and **2** (d).

**Table S3** *cis*-Cyclooctene epoxidation with TBHP<sub>D</sub> in the presence of compounds **1** and **2**, and comparison to literature data for molybdenum carbonyl complexes bearing N-donor ligands, tested as pre-catalysts, at 55 °C without additional solvent.

| Entry | Complex <sup>a</sup>                                                                                   | Mo:Cy:TBHP <sub>D</sub> <sup>b</sup> | t (h) | Conv. (%) <sup>c</sup> | Select. (%) <sup>d</sup> | Ref.      |
|-------|--------------------------------------------------------------------------------------------------------|--------------------------------------|-------|------------------------|--------------------------|-----------|
| 1     | <b>1</b>                                                                                               | 1:113:172                            | 6/24  | 35/54                  | 89/85                    | This work |
| 2     | <b>2</b>                                                                                               | 1:113:172                            | 6/24  | 31/52                  | 97/92                    | This work |
| 3     | [Mo(CO) <sub>4</sub> (pzpyH)]                                                                          | 1:100:152                            | 6/24  | 51/78                  | 100/100                  | 12        |
| 4     | [Mo(CO) <sub>4</sub> (pzpyE)]                                                                          | 1:100:152                            | 6/24  | 70/92                  | 100/100                  | 12        |
| 5     | [Mo(CO) <sub>4</sub> (pyim)]                                                                           | 1:100:153                            | 5     | 100                    | 100                      | 13        |
| 6     | [Mo(CO) <sub>4</sub> (PyNHC)]                                                                          | 1:100:200                            | 4/24  | ~3/~9                  | ~100/~100                | 14        |
| 7     | [Mo(CO) <sub>3</sub> (Py <sub>2</sub> NHC)]                                                            | 1:100:200                            | 4/24  | ~3/~16                 | ~100/~100                | 14        |
| 8     | [Mo(CO) <sub>3</sub> (Me <sub>3</sub> -tame)]                                                          | 1:100:154                            | 24    | 64                     | 100                      | 15        |
| 9     | [Mo( $\eta^3$ -C <sub>3</sub> H <sub>5</sub> )Cl(CO) <sub>2</sub> (CH <sub>3</sub> CN) <sub>2</sub> ]  | 1:100:159                            | 6/24  | 99/100                 | 100/100                  | 16        |
| 10    | [Mo( $\eta^3$ -C <sub>3</sub> H <sub>5</sub> )Br(CO) <sub>2</sub> (CH <sub>3</sub> CN) <sub>2</sub> ]  | 1:100:159                            | 6/24  | 99/100                 | 100/100                  | 16        |
| 11    | [Mo( $\eta^3$ -C <sub>5</sub> H <sub>5</sub> O)Br(CO) <sub>2</sub> (CH <sub>3</sub> CN) <sub>2</sub> ] | 1:100:159                            | 6/24  | 97/100                 | 100/100                  | 16        |
| 12    | [Mo( $\eta^3$ -C <sub>3</sub> H <sub>5</sub> )Cl(CO) <sub>2</sub> (L <sup>*</sup> )]                   | 1:100:159                            | 6/24  | 88/95                  | 100/100                  | 16        |
| 13    | [Mo( $\eta^3$ -C <sub>3</sub> H <sub>5</sub> )Cl(CO) <sub>2</sub> (L <sup>**</sup> )]                  | 1:100:159                            | 6/24  | 68/88                  | 100/100                  | 16        |
| 14    | [Mo( $\eta^3$ -C <sub>3</sub> H <sub>5</sub> )Cl(CO) <sub>2</sub> (L <sup>***</sup> )]                 | 1:100:159                            | 6/24  | 99/100                 | 100/100                  | 16        |
| 15    | [Mo( $\eta^3$ -C <sub>3</sub> H <sub>5</sub> )Br(CO) <sub>2</sub> (L <sup>***</sup> )]                 | 1:100:159                            | 6/24  | 99/100                 | 100/100                  | 16        |
| 16    | [Mo( $\eta^3$ -C <sub>5</sub> H <sub>5</sub> O)Br(CO) <sub>2</sub> (L <sup>***</sup> )]                | 1:100:159                            | 6/24  | 97/100                 | 100/100                  | 16        |
| 17    | [CpMo(CO) <sub>2</sub> (IMes)(CH <sub>3</sub> CN)]BF <sub>4</sub>                                      | 1:100:200                            | 4/24  | ~90/~100               | ~100/~100                | 17        |

<sup>a</sup> pzpyH = 2-[3(5)-pyrazolyl]pyridine; pzpyE = ethyl[3-(2-pyridyl)-1-pyrazolyl]acetate; pyim = N-(n-propyl)-2-pyridylmethanimine; PyNHC = 3-methyl-1-picolyylimidazol-2-ylidene; Py<sub>2</sub>NHC = 1,3-dipicolyylimidazol-2-ylidene; Me<sub>3</sub>-tame = 1,1,1-tris(methylaminomethyl)ethane; L<sup>\*</sup> = 1,4-(2,6-dimethyl)phenyl-2,3-dimethyldiazabutadiene; L<sup>\*\*</sup> = 1,4-(2,6-diisopropyl)-phenyldiazabutadiene; L<sup>\*\*\*</sup> = 1,4-(4-chloro)phenyl-2,3-naphthalenediazabutadiene; IMes = 1,3-bis(2,4,6-trimethylphenyl)imidazol-2-ylidene. <sup>b</sup> Initial Mo:Cy:TBHP<sub>D</sub> molar ratio. <sup>c</sup> *cis*-Cyclooctene conversion. <sup>d</sup> Selectivity to the epoxide (CyO).

**Table S4** Comparison of FT-IR bands observed for solids recovered after catalytic reactions (entries 1-7) with corresponding bands for compounds containing the  $\beta$ -[Mo<sub>8</sub>O<sub>26</sub>]<sup>4-</sup> anion.

| Compound <sup>a</sup>                                                                                                    | IR bands (cm <sup>-1</sup> ) |                  |                  |                  |                  | Ref.      |
|--------------------------------------------------------------------------------------------------------------------------|------------------------------|------------------|------------------|------------------|------------------|-----------|
| <b>1-S-TBHP<sub>D</sub></b> <sup>b</sup>                                                                                 | 941 <sup>c</sup>             | 910 <sup>c</sup> | 840 <sup>d</sup> | 705 <sup>d</sup> | 660 <sup>d</sup> | This work |
| <b>1-S-TBHP<sub>D</sub>-[bmim]NTf<sub>2</sub></b> <sup>b</sup>                                                           | 937                          | 911/903          | 838              | 706/693          | 659              | This work |
| <b>1-S-H<sub>2</sub>O<sub>2</sub></b> <sup>b</sup>                                                                       | 940                          | 910              | 841              | 705              | 658              | This work |
| <b>2-S-TBHP<sub>D</sub></b> <sup>b</sup>                                                                                 | 942                          | 910              | 842              | 706              | 660              | This work |
| <b>2-S-TBHP<sub>D</sub>-[bmim]NTf<sub>2</sub></b> <sup>b</sup>                                                           | 937                          | 910/900          | 837              | 707/693          | 658              | This work |
| <b>3-S-TBHP<sub>D</sub></b> <sup>b</sup>                                                                                 | 941                          | 909              | 841              | 705              | 659              | This work |
| <b>3-S-TBHP<sub>D</sub>-[bmim]NTf<sub>2</sub></b> <sup>b</sup>                                                           | 938                          | 911/902          | 839              | 705/691          | 658              | This work |
| (bmim) <sub>3</sub> NH <sub>4</sub> [Mo <sub>8</sub> O <sub>26</sub> ] ( <b>6</b> ) <sup>b</sup>                         | 933                          | 909/898          | 837              | 704/692          | 657              | This work |
| (H <sub>3</sub> biim) <sub>4</sub> [Mo <sub>8</sub> O <sub>26</sub> ]                                                    | 944                          | 919              | 838              | 686              | 670              | 18        |
| (C <sub>5</sub> H <sub>5</sub> NH) <sub>4</sub> [Mo <sub>8</sub> O <sub>26</sub> ]                                       | 946                          | 912              | 839              | 709              | 675              | 19        |
| ((CH <sub>3</sub> ) <sub>3</sub> CC <sub>5</sub> H <sub>4</sub> NH) <sub>4</sub> [Mo <sub>8</sub> O <sub>26</sub> ]      | 949                          | 914              | 837              | 708              | 659              | 19        |
| (HDBU) <sub>3</sub> (NH <sub>4</sub> )[Mo <sub>8</sub> O <sub>26</sub> ] · H <sub>2</sub> O                              | 939                          | 910              | 842              | 720              | 669              | 20        |
| (Hmim) <sub>4</sub> [Mo <sub>8</sub> O <sub>26</sub> ]                                                                   | 946                          | 910              | 841              | 710              | 665              | 21        |
| (Dhmim) <sub>4</sub> [Mo <sub>8</sub> O <sub>26</sub> ]                                                                  | 956                          | 911              | 837              | 714              | 650              | 21        |
| (Hpy) <sub>4</sub> [Mo <sub>8</sub> O <sub>26</sub> ] · H <sub>2</sub> O                                                 | 947                          | 911              | 836              | 717              | 632              | 21        |
| (bmim) <sub>4</sub> [Mo <sub>8</sub> O <sub>26</sub> ]                                                                   | 939                          | 913              | 842              | 714              | 661              | 3         |
| (BDMLPX) <sub>3</sub> [Mo <sub>8</sub> O <sub>26</sub> ] <sub>2</sub> (H <sub>3</sub> O) <sub>2</sub> · H <sub>2</sub> O | 944                          | 902              | 841              | 711              | 651              | 22        |
| (L) <sub>x</sub> [β-Mo <sub>8</sub> O <sub>26</sub> ] <sup>b</sup>                                                       | 935                          | 910/898          | 836              | 699              | 657              | 23        |

<sup>a</sup> H<sub>2</sub>biim = 2,2'-biimidazole; DBU = 1,8-diazabicyclo[5.4.0]undec-7-ene; Hmim = 1-hexyl-3-methylimidazolium; Dhmim = 1,2-dimethyl-3-hexylimidazolium; Hpy = 1-hexylpyridinium; BDMLPX = di(1,2-dimethylimidazolium) p-xylenedichloride; L = monoprotonated [4,4'-Hbipy]<sup>+</sup> cations or, alternatively, a mixture of neutral 4,4'-bipy and diprotonated [4,4'-H<sub>2</sub>bipy]<sup>2+</sup> cations. <sup>b</sup> ATR FT-IR bands. <sup>c</sup> Bands attributed to  $\nu(\text{Mo}=\text{O}_t)$  vibrations. <sup>d</sup> Bands attributed to  $\nu(\text{Mo}-\text{O}-\text{Mo})$  vibrations.

**Table S5** Elemental analysis results.

| Compound                                                                                                                                                                                                                                     |       | C (%) | H (%) | N (%) |
|----------------------------------------------------------------------------------------------------------------------------------------------------------------------------------------------------------------------------------------------|-------|-------|-------|-------|
| (bmim) <sub>3</sub> NH <sub>4</sub> [Mo <sub>8</sub> O <sub>26</sub> ] ( <b>6</b> )<br>C <sub>24</sub> H <sub>49</sub> N <sub>7</sub> Mo <sub>8</sub> O <sub>26</sub>                                                                        | Found | 17.89 | 2.98  | 6.10  |
|                                                                                                                                                                                                                                              | Calcd | 17.80 | 3.05  | 6.06  |
| Recovered solid <b>2-S-TBHP<sub>D</sub></b><br>(ptapzpy) <sub>4</sub> [Mo <sub>8</sub> O <sub>26</sub> ] (C <sub>56</sub> H <sub>84</sub> N <sub>16</sub> Mo <sub>8</sub> O <sub>26</sub> ) ( <b>4</b> )                                     | Found | 30.47 | 4.10  | 9.76  |
|                                                                                                                                                                                                                                              | Calcd | 31.07 | 3.91  | 10.35 |
| Recovered solid <b>2-S-TBHP<sub>D</sub>-[bmim]NTf<sub>2</sub></b><br>(bmim) <sub>3</sub> (H <sub>3</sub> O)[Mo <sub>8</sub> O <sub>26</sub> ] (C <sub>24</sub> H <sub>48</sub> N <sub>6</sub> Mo <sub>8</sub> O <sub>27</sub> ) ( <b>5</b> ) | Found | 17.50 | 3.31  | 5.24  |
|                                                                                                                                                                                                                                              | Calcd | 17.79 | 2.99  | 5.19  |

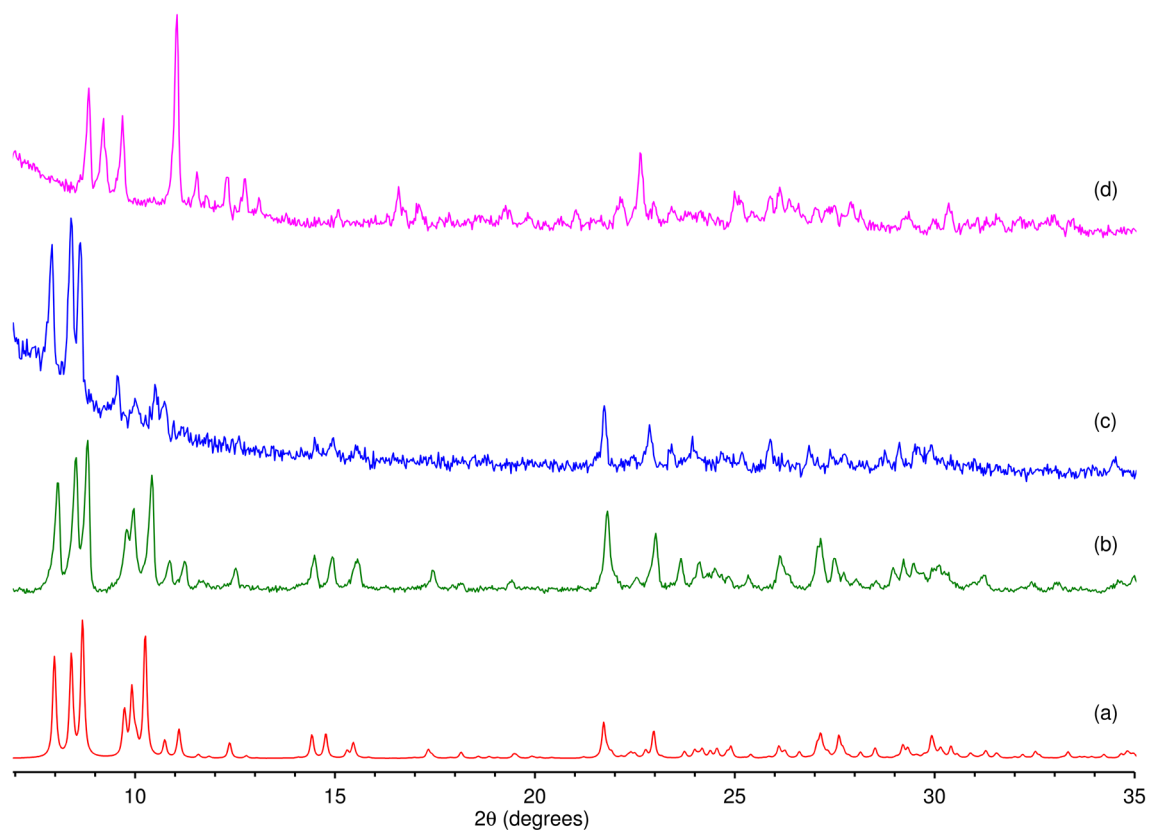

**Fig. S6** Simulated (a) and experimental (b-d) powder XRD patterns of (a)  $(\text{bmim})_3\text{NH}_4[\text{Mo}_8\text{O}_{26}]$ , (b)  $(\text{bmim})_3\text{NH}_4[\text{Mo}_8\text{O}_{26}]$  (**6**), (c) the recovered solid **2-S-TBHP<sub>D</sub>**-[bmim]NTf<sub>2</sub>, and (d) the recovered solid **2-S-TBHP<sub>D</sub>**. The program Mercury (copyright CCDC, ver. 3.9)<sup>24</sup> was used to calculate the simulated pattern from the single-crystal X-ray data published for  $(\text{bmim})_3\text{NH}_4[\text{Mo}_8\text{O}_{26}]$ .<sup>4</sup>

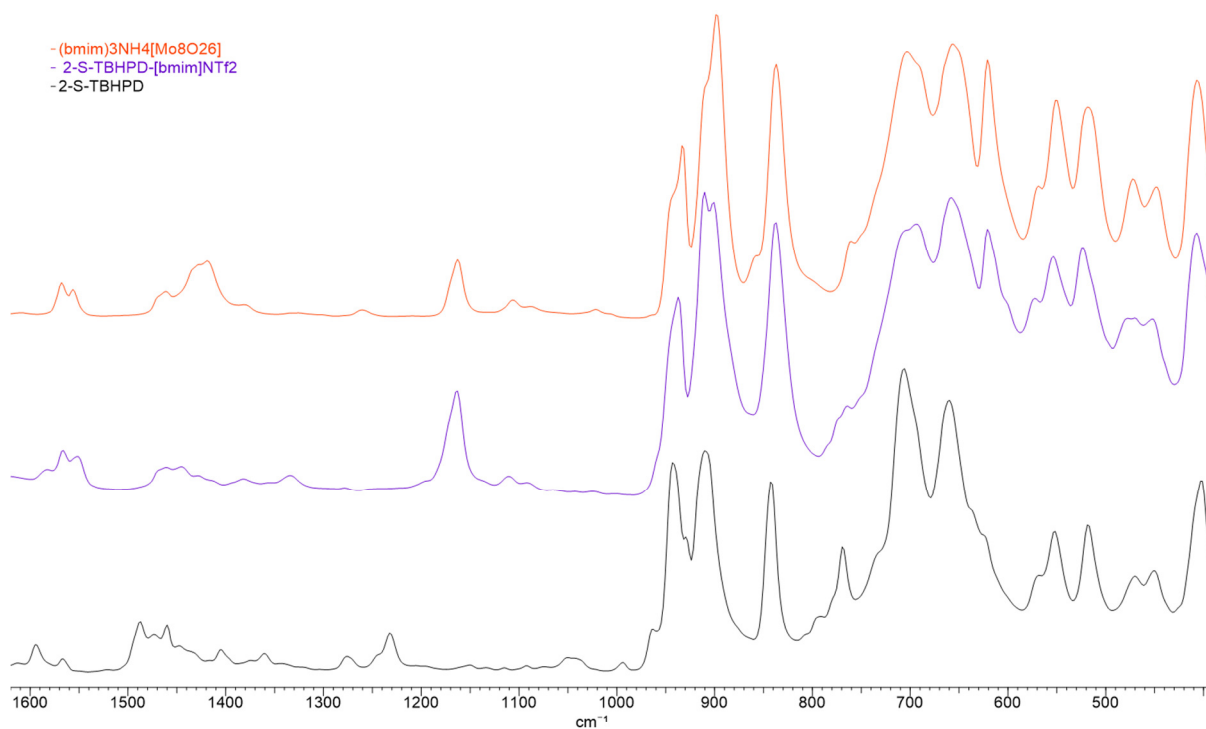

**Fig. S7** ATR FT-IR spectra for the recovered solids **2-S-TBHP<sub>D</sub>** and **2-S-TBHP<sub>D</sub>**-[bmim]NTf<sub>2</sub>, and the salt  $(\text{bmim})_3\text{NH}_4[\text{Mo}_8\text{O}_{26}]$  (**6**).

## References

- 1 H. Brunner and T. Scheck, *Chem. Ber.*, 1992, **125**, 701–709.
- 2 D. J. Darensbourg and R. L. Kump, *Inorg. Chem.*, 1978, **17**, 2680–2682.
- 3 C. J. Carrasco, F. Montilla, E. Álvarez, M. Herbert and A. Galindo, *Polyhedron*, 2013, **54**, 123.
- 4 S. L. Linguito, X. Zhang, M. Padmanabhan, A. V. Biradar, T. Xu, T. J. Emge, T. Asefa and J. Li, *New J. Chem.*, 2013, **37**, 2894.
- 5 T. Kottke and D. Stalke, *J. Appl. Crystallogr.*, 1993, **26**, 615–619.
- 6 APEX2 Data Collection Software, Version 2012.4, Bruker AXS, Delft, The Netherlands, 2012.
- 7 SAINT+, *Data Integration Engine*, version 8.27b, 1997–2012, Bruker AXS, Madison, Wisconsin, USA.
- 8 G. M. Sheldrick, SADABS, version 2012/1, Bruker AXS Area Detector Scaling and Absorption Correction Program, Bruker AXS, Madison, Wisconsin, USA.
- 9 G. M. Sheldrick, *Acta Crystallogr., Sect. A: Found. Crystallogr.*, 2008, **64**, 112–122.
- 10 G. M. Sheldrick, SHELXT-2014, *Program for Crystal Structure Solution*, University of Göttingen, 2014.
- 11 G. M. Sheldrick, SHELXL, version 2014/3, *Program for Crystal Structure Refinement*, University of Göttingen, 2014.
- 12 P. Neves, T. R. Amarante, A. C. Gomes, A. C. Coelho, S. Gago, M. Pillinger, I. S. Gonçalves, C. M. Silva and A. A. Valente, *Appl. Catal. A: Gen.*, 2011, **395**, 71.
- 13 A. C. Gomes, S. M. Bruno, S. Gago, R. P. Lopes, D. A. Machado, A. P. Carminatti, A. A. Valente, M. Pillinger and I. S. Gonçalves, *J. Organomet. Chem.*, 2011, **696**, 3543.
- 14 Z. Wang, S. Li, W. J. Teo, Y. T. Poh, J. Zhao and T. S. A. Hor, *J. Organomet. Chem.*, 2015, **775**, 188.
- 15 Ž. Petrovski, A. A. Valente, M. Pillinger, A. S. Dias, S. S. Rodrigues, C. C. Romão and I. S. Gonçalves, *J. Mol. Catal. A: Chem.*, 2006, **249**, 166.
- 16 J. C. Alonso, P. Neves, M. J. Pires da Silva, S. Quintal, P. D. Vaz, C. Silva, A. A. Valente, P. Ferreira, M. J. Calhorda, V. Félix and M. G. B. Drew, *Organometallics*, 2007, **26**, 5548.
- 17 S. Li, C. W. Kee, K.-W. Huang, T. S. A. Hor and J. Zhao, *Organometallics*, 2010, **29**, 1924.
- 18 P. Neves, T. R. Amarante, A. A. Valente, M. Pillinger and I. S. Gonçalves, *Catal. Lett.*, 2016, **146**, 841.
- 19 C. A. Gamelas, P. Neves, A. C. Gomes, A. A. Valente, C. C. Romão, I. S. Gonçalves and M. Pillinger, *Catal. Lett.*, 2012, **142**, 1218.
- 20 V. Coue, R. Dessapt, M. Bujoli-Doeuff, M. Evain and S. Jobic, *J. Solid State Chem.*, 2006, **179**, 3615.
- 21 M. D. Zhou, M. J. Liu, L. L. Huang, J. Zhang, J. Y. Wang, X. B. Li, F. E. Kuhn and S. L. Zang, *Green Chem.*, 2015, **17**, 1186.
- 22 Y. Li, Z. Z. Shu, Q. Yang, Y. X. Zai, C. J. Ma, Z. P. Huang, Z. C. Yue and Y. Y. Niu, *Synthesis and Reactivity in Inorganic Metal-Organic and Nano-Metal Chemistry*, 2016, **46**, 280.
- 23 P. Neves, A. C. Gomes, F. A. A. Paz, A. A. Valente, I. S. Gonçalves and M. Pillinger, *Mol. Catal.*, 2017, **432**, 104.
- 24 C. F. Macrae, I. J. Bruno, J. A. Chisholm, P. R. Edgington, P. McCabe, E. Pidcock, L. Rodriguez-Monge, R. Taylor, J. van de Streek and P. A. Wood, Mercury CSD 2.0 - new features for the visualization and investigation of crystal structures, *J. Appl. Crystallogr.*, 2008, **41**, 466.
